# Supplementary material for: Genetic Characterization of Cancer of Unknown Primary Using Liquid Biopsy Approaches
Source: Front Cell Dev Biol. 2021 Jun 10;9:666156. doi: 10.3389/fcell.2021.666156 (PMC8222689; doi:10.3389/fcell.2021.666156)
Supplement: Supplementary Table 1 — List of genes and regions included in SureSelect custom panel. [file Table_1.XLSX]

## Sheet: geni
Supplementary Table 1. List of genes and regions included in SureSelect custom panel
Gene	Covered region
ACD	coding exons + 5' and 3' UTR (25 bp of flanking bases at 3' and 5')
ALK	coding exons + 5' and 3' UTR (25 bp of flanking bases at 3' and 5')
APC	coding exons + 5' and 3' UTR (25 bp of flanking bases at 3' and 5')
ARID1A	coding exons + 5' and 3' UTR (25 bp of flanking bases at 3' and 5')
ARID1B	coding exons + 5' and 3' UTR (25 bp of flanking bases at 3' and 5')
ASXL2	coding exons + 5' and 3' UTR (25 bp of flanking bases at 3' and 5')
ATM	coding exons + 5' and 3' UTR (25 bp of flanking bases at 3' and 5')
ATR	coding exons + 5' and 3' UTR (25 bp of flanking bases at 3' and 5')
ATRX	coding exons + 5' and 3' UTR (25 bp of flanking bases at 3' and 5')
BAP1	coding exons + 5' and 3' UTR (25 bp of flanking bases at 3' and 5')
BCOR	coding exons + 5' and 3' UTR (25 bp of flanking bases at 3' and 5')
BLM	coding exons + 5' and 3' UTR (25 bp of flanking bases at 3' and 5')
BRAF	coding exons + 5' and 3' UTR (25 bp of flanking bases at 3' and 5')
CARD11	coding exons + 5' and 3' UTR (25 bp of flanking bases at 3' and 5')
CCNE1	coding exons + 5' and 3' UTR (25 bp of flanking bases at 3' and 5')
CDK4	coding exons + 5' and 3' UTR (25 bp of flanking bases at 3' and 5')
CDKN2A	coding exons + 5' and 3' UTR (25 bp of flanking bases at 3' and 5')
CDKN2B	coding exons + 5' and 3' UTR (25 bp of flanking bases at 3' and 5')
CIC	coding exons + 5' and 3' UTR (25 bp of flanking bases at 3' and 5')
CREBBP	coding exons + 5' and 3' UTR (25 bp of flanking bases at 3' and 5')
CTNNB1	coding exons + 5' and 3' UTR (25 bp of flanking bases at 3' and 5')
DOT1L	coding exons + 5' and 3' UTR (25 bp of flanking bases at 3' and 5')
EGFR	coding exons + 5' and 3' UTR (25 bp of flanking bases at 3' and 5')
EP300	coding exons + 5' and 3' UTR (25 bp of flanking bases at 3' and 5')
EPHA3	coding exons + 5' and 3' UTR (25 bp of flanking bases at 3' and 5')
EPHA5	coding exons + 5' and 3' UTR (25 bp of flanking bases at 3' and 5')
EPHA7	coding exons + 5' and 3' UTR (25 bp of flanking bases at 3' and 5')
ERBB2	coding exons + 5' and 3' UTR (25 bp of flanking bases at 3' and 5')
ERBB3	coding exons + 5' and 3' UTR (25 bp of flanking bases at 3' and 5')
ERBB4	coding exons + 5' and 3' UTR (25 bp of flanking bases at 3' and 5')
FAT1	coding exons + 5' and 3' UTR (25 bp of flanking bases at 3' and 5')
FBXW7	coding exons + 5' and 3' UTR (25 bp of flanking bases at 3' and 5')
FGFR2	coding exons + 5' and 3' UTR (25 bp of flanking bases at 3' and 5')
FLT4	coding exons + 5' and 3' UTR (25 bp of flanking bases at 3' and 5')
GRIN2A	coding exons + 5' and 3' UTR (25 bp of flanking bases at 3' and 5')
HGF	coding exons + 5' and 3' UTR (25 bp of flanking bases at 3' and 5')
HIST1H1C	coding exons + 5' and 3' UTR (25 bp of flanking bases at 3' and 5')
HNF1A	coding exons + 5' and 3' UTR (25 bp of flanking bases at 3' and 5')
INPP4B	coding exons + 5' and 3' UTR (25 bp of flanking bases at 3' and 5')
JAK3	coding exons + 5' and 3' UTR (25 bp of flanking bases at 3' and 5')
KDM5A	coding exons + 5' and 3' UTR (25 bp of flanking bases at 3' and 5')
KDR	coding exons + 5' and 3' UTR (25 bp of flanking bases at 3' and 5')
KEAP1	coding exons + 5' and 3' UTR (25 bp of flanking bases at 3' and 5')
KIT	coding exons + 5' and 3' UTR (25 bp of flanking bases at 3' and 5')
KMT2C	coding exons + 5' and 3' UTR (25 bp of flanking bases at 3' and 5')
KMT2D	coding exons + 5' and 3' UTR (25 bp of flanking bases at 3' and 5')
KRAS	coding exons + 5' and 3' UTR (25 bp of flanking bases at 3' and 5')
MC1R	coding exons + 5' and 3' UTR (25 bp of flanking bases at 3' and 5')
MCL1	coding exons + 5' and 3' UTR (25 bp of flanking bases at 3' and 5')
MDC1	coding exons + 5' and 3' UTR (25 bp of flanking bases at 3' and 5')
MED12	coding exons + 5' and 3' UTR (25 bp of flanking bases at 3' and 5')
MET	coding exons + 5' and 3' UTR (25 bp of flanking bases at 3' and 5')
MGA	coding exons + 5' and 3' UTR (25 bp of flanking bases at 3' and 5')
MITF	coding exons + 5' and 3' UTR (25 bp of flanking bases at 3' and 5')
MTOR	coding exons + 5' and 3' UTR (25 bp of flanking bases at 3' and 5')
MYC	coding exons + 5' and 3' UTR (25 bp of flanking bases at 3' and 5')
NF1	coding exons + 5' and 3' UTR (25 bp of flanking bases at 3' and 5')
NF2	coding exons + 5' and 3' UTR (25 bp of flanking bases at 3' and 5')
NOTCH1	coding exons + 5' and 3' UTR (25 bp of flanking bases at 3' and 5')
NOTCH2	coding exons + 5' and 3' UTR (25 bp of flanking bases at 3' and 5')
NOTCH3	coding exons + 5' and 3' UTR (25 bp of flanking bases at 3' and 5')
NOTCH4	coding exons + 5' and 3' UTR (25 bp of flanking bases at 3' and 5')
NRAS	coding exons + 5' and 3' UTR (25 bp of flanking bases at 3' and 5')
NTRK1	coding exons + 5' and 3' UTR (25 bp of flanking bases at 3' and 5')
NTRK3	coding exons + 5' and 3' UTR (25 bp of flanking bases at 3' and 5')
PALB2	coding exons + 5' and 3' UTR (25 bp of flanking bases at 3' and 5')
PBRM1	coding exons + 5' and 3' UTR (25 bp of flanking bases at 3' and 5')
PIK3C2G	coding exons + 5' and 3' UTR (25 bp of flanking bases at 3' and 5')
PIK3CA	coding exons + 5' and 3' UTR (25 bp of flanking bases at 3' and 5')
PIK3CG	coding exons + 5' and 3' UTR (25 bp of flanking bases at 3' and 5')
PLCG2	coding exons + 5' and 3' UTR (25 bp of flanking bases at 3' and 5')
POLD1	coding exons + 5' and 3' UTR (25 bp of flanking bases at 3' and 5')
POT1	coding exons + 5' and 3' UTR (25 bp of flanking bases at 3' and 5')
PPP6C	coding exons + 5' and 3' UTR (25 bp of flanking bases at 3' and 5')
PTPRD	coding exons + 5' and 3' UTR (25 bp of flanking bases at 3' and 5')
PTPRT	coding exons + 5' and 3' UTR (25 bp of flanking bases at 3' and 5')
RB1	coding exons + 5' and 3' UTR (25 bp of flanking bases at 3' and 5')
RBM10	coding exons + 5' and 3' UTR (25 bp of flanking bases at 3' and 5')
RET	coding exons + 5' and 3' UTR (25 bp of flanking bases at 3' and 5')
RHOA	coding exons + 5' and 3' UTR (25 bp of flanking bases at 3' and 5')
ROS1	coding exons + 5' and 3' UTR (25 bp of flanking bases at 3' and 5')
RPTOR	coding exons + 5' and 3' UTR (25 bp of flanking bases at 3' and 5')
SETD2	coding exons + 5' and 3' UTR (25 bp of flanking bases at 3' and 5')
SMAD4	coding exons + 5' and 3' UTR (25 bp of flanking bases at 3' and 5')
SMARCA4	coding exons + 5' and 3' UTR (25 bp of flanking bases at 3' and 5')
SPEN	coding exons + 5' and 3' UTR (25 bp of flanking bases at 3' and 5')
STAG2	coding exons + 5' and 3' UTR (25 bp of flanking bases at 3' and 5')
STK11	coding exons + 5' and 3' UTR (25 bp of flanking bases at 3' and 5')
TERT	coding exons + 5' and 3' UTR (25 bp of flanking bases at 3' and 5')
TGFBR1	coding exons + 5' and 3' UTR (25 bp of flanking bases at 3' and 5')
TP53	coding exons + 5' and 3' UTR (25 bp of flanking bases at 3' and 5')
ZFHX3	coding exons + 5' and 3' UTR (25 bp of flanking bases at 3' and 5')
TMEM38B	rs10739221
TYR	rs1126809
CCND1	rs12422135, rs2290419, rs498136
FTO	rs12596638
OCA2	rs145720174
AGR3	rs1636744
SLC45A2	rs16891982
PARP1	rs2249844, rs1858550
GC	rs2282679
CASP8	rs2349073
OBFC1	rs2995264
ARNT	rs3768013
MX2	rs443099
RMND2	rs6750047
CDKALI	rs6914598
TYRP1	rs72706189
ASIP	rs74325991, rs2377956
IRF4	rs9405705
